# Supplementary material for: Source-to-Sink Pathways of Dissolved Organic Carbon in the River-Estuary-Ocean Continuum: A Modeling Investigation
Source: Copernicus journal article supplement (doi:10.5194/bg-2024-2), 2024-04-12
Supplement: Supplementary file 1 [file bg-2024-2-supplement.pdf]

Supplement of

## Source-to-Sink Pathways of Dissolved Organic Carbon in the River-Estuary-Ocean Continuum: A Modeling Investigation

Jialing Yao<sup>1,2</sup>, Zhi Chen<sup>1</sup>, Jianzhong Ge<sup>1</sup>, and Wenyan Zhang<sup>2</sup>

<sup>1</sup>State Key Laboratory of Estuarine and Coastal Research, East China Normal University, Shanghai, China.

<sup>2</sup>Institute of Coastal Systems-Analysis and Modeling, Helmholtz-Zentrum Hereon, Geesthacht, Germany.

Correspondence to: Jianzhong Ge (jzge@sklec.ecnu.edu.cn), Wenyan Zhang (wenyan.zhang@hereon.de)

### Text S1. DOC cycle module

The equations for the conservation of dissolved carbon in all pools are provided as follows. The labile DOC ( $R_1$ ) is affected by bacteria mortality and uptake, phytoplankton mortality, and zooplankton excretion and mortality:

$$\begin{aligned} \frac{\partial R_1}{\partial t} = & f^t r_{mort} B_c - \min\left(1, \frac{G_{env}}{G_{sub}}\right) n_1 R_1 + (1 - \min\left(\frac{qp_{min}}{q_{P:C}}, \frac{qn_{min}}{q_{N:C}}, 1.0\right)) f_{lysis} P_c + q_{R_1} q_{dis} (1.0 \\ & - a_e) q_{exc} r_{ass} f^t \frac{F_c^{total}}{F_c^{total} + h_f} Z_c + q_{R_1} q_{dis} ((1 - e_{O_2}) r_{mortox} + r_{mort}) Z_c \end{aligned}$$

where  $f^t$  is a temperature-dependent growth function (Blackford et al., 2004).  $r_{mort}$  represents the basal mortality rate, and  $B_c$  is the bacterial carbon. The bacterial uptake depends on the magnitude of both maximum potential uptake  $G_{env}$  and substrate availability  $G_{sub}$ .  $n_1$  signifies the fraction of  $R_1$  available to bacteria. Within the phytoplankton lysis term,  $qp_{min}$  and  $qn_{min}$  represent the minimal P/C and N/C ratio, respectively.  $q_{P:C}$  and  $q_{N:C}$  are the instantaneously calculated P/C and N/C cellular ratios, respectively.  $f_{lysis}$  is the nutrient-stress lysis rate which occurs proportionally to the current biomass.  $P_c$  is phytoplankton biomass. In the last two terms,  $q_{R_1}$  is the labile fraction of produced dissolved organic carbon.  $q_{dis}$  is the dissolved fraction of excreted/dying matter.  $a_e$  is the assimilation efficiency,  $q_{exc}$  is the fraction of unassimilated prey that is excreted.  $r_{ass}$  is maximal assimilation rate at reference temperature.  $F_c^{total}$  signifies the carbon of total food available.  $h_f$  is the food concentration where uptake is 0.5.  $Z_c$  is the biomass of zooplankton.  $e_{O_2}$  is an oxygen limitation factor,  $r_{mortox}$  represents the mortality rate at low oxygen concentrations.

The semi-labile DOC ( $R_2$ ) is affected by bacteria release and uptake, phytoplankton excretion:

$$\frac{\partial R_2}{\partial t} = \max \left[ 0, \max \left( 1 - \frac{q_{P:C}}{p^{opt}}, 1 - \frac{q_{N:C}}{n^{opt}} \right) B_c v - \min \left( 1, \frac{G_{env}}{G_{sub}} \right) n_2 R_2 + (p_{ex} + (1 - iNI)(1 - p_{ex})) f_{phosyn} P_c \right]$$

where  $p^{opt}$  and  $n^{opt}$  are maximum phosphorus to carbon ratio and maximum nitrogen to carbon ratio.  $v$  is the characteristic time-scale of the process (supposed to be 1 d).  $n_2$  denotes the fraction of  $R_2$  available to bacteria.  $p_{ex}$  signifies the portion of primary production released as activity-dependent excretion.  $iNI$  is co-limitation of inorganic nitrogen and phosphorus (Droop, 1974).  $f_{phosyn}$  represents the gross photosynthetic activity rate.

The semi-refractory DOC ( $R_3$ ) is influenced by bacteria excretion and uptake:

$$\frac{\partial R_3}{\partial t} = q_{R_3} (1 - r_{resp} O_{rel} - r_{respox} (1 - O_{rel})) \min \left( 1, \frac{G_{env}}{G_{sub}} \right) - \min \left( 1, \frac{G_{env}}{G_{sub}} \right) n_3 R_3$$

It is assumed that the proportion of recalcitrant carbon released in the form of semi-refractory material is determined by a factor  $q_{R_3}$  related to the metabolic cost of uptake activity.  $r_{resp}$  and  $r_{respox}$  represent the efficiency of the respired fraction of carbon uptake under high and low oxygen conditions, respectively.  $O_{rel}$  is relative oxygen saturation.  $n_3$  is fraction of  $R_3$  available to bacteria.

The  $T_1$  includes river input, photo-oxidation, bacterial uptake, and flocculation. The photo-oxidation process is only considered in the surface layer.

$$\frac{\partial T_1}{\partial t} = \frac{\partial T_1}{\partial t} \Big|_{river} - (1 + q_a) r_{phooxi} \frac{I q_{scaling}}{I_{ref}} T_1 - \min \left( 1, \frac{G_{env}}{G_{sub}} \right) n_{T_1} T_1 - r_{floc} e^{-\frac{-(\ln(Sal) - i_{flocmax})^2}{2i_{PAR}^2}} T_1^2$$

where  $q_a$  is fraction of tDOC aging due to photo-oxidation,  $r_{phooxi}$  is reference surface photo-oxidation rate.  $I$  and  $I_{ref}$  are instantaneous irradiance and reference surface photo-oxidation rate, respectively.  $q_{scaling}$  is the scaling factor for incoming radiation activating photochemical reaction.  $n_{T_1}$  is fraction of  $T_1$  available to bacteria.  $r_{floc}$  is the maximum flocculation rate,  $i_{flocmax}$  represents the logarithm of salinity at the point of maximum flocculation.  $i_{PAR}$  is the salinity function parameter.

The  $T_2$  includes river input, transformation from  $T_1$ , and bacterial uptake.

$$\frac{\partial T_2}{\partial t} = \frac{\partial T_2}{\partial t} \Big|_{river} + q_{T_1 T_2} (1 + q_a) r_{phooxi} \frac{I q_{scaling}}{I_{ref}} T_1 - \min \left( 1, \frac{G_{env}}{G_{sub}} \right) n_{T_2} T_2$$

where  $q_{T_1 T_2}$  is photo-oxidated fraction of  $T_1$  going into  $T_2$ .  $n_{T_2}$  is fraction of  $T_2$  available to bacteria. The key configuration of parameters related to DOC cycling are listed in Table S1.

**Table S1.** Key parameters configuration related to DOC cycling in the FVCOM-ERSEM model.

| Notation      | Description                                                                                   | Value    |              |          |       | Unit             |
|---------------|-----------------------------------------------------------------------------------------------|----------|--------------|----------|-------|------------------|
| Bacteria      |                                                                                               | B1       |              |          |       |                  |
| rR2           | Availability of R2                                                                            | 0.04     |              |          |       | -                |
| rR3           | Availability of R3                                                                            | 0.002    |              |          |       | -                |
| rTD1          | Availability of T1 pool1                                                                      | 0.00282  |              |          |       | -                |
| rTD2          | Availability of T1 pool2                                                                      | 0.000501 |              |          |       | -                |
| rTD3          | Availability of T1 pool3                                                                      | 0.00022  |              |          |       | -                |
| rTD4          | Availability of T2 pool1                                                                      | 0.00848  |              |          |       | -                |
| rTD5          | Availability of T2 pool2                                                                      | 0.001508 |              |          |       | -                |
| rTD6          | Availability of T2 pool3                                                                      | 0.000661 |              |          |       | -                |
| Phytoplankton | Diatoms (P1),<br>nanophytoplankton (P2),<br>picoplankton (P3), and<br>microphytoplankton (P4) | P1       | P2           | P3       | P4    |                  |
| sum           | Assimilation rate at 10 °C                                                                    | 0.825    | 0.975        | 1.2      | 0.675 | 1 d-1            |
| Zooplankton   | Mesozooplankton(Z4),<br>microzooplankton (Z5),<br>heterotrophic flagellates (Z6)              | Z4       | Z5           | Z6       |       |                  |
| sum           | Assimilation rate at 10 °C                                                                    | 1        | 1.75         | 2.1      |       | 1 d-1            |
| T1            | Photolabile tDOC(T1_30d),<br>aging T1_30d(T1_8y), aging<br>T1_8y (T1_70y)                     | T1_30d   | T1_8y        | T1_70y   |       |                  |
| photoaging    | Fraction of tDOC aging                                                                        | 0.5      | 0.025        | 0        |       | -                |
| bioaging      | Aging due to microbial<br>degradation                                                         | 0.5      | 0.025        | 0        |       |                  |
| surf_phyref   | Reference photooxidation rate                                                                 | 0.05175  | 0.0092       | 0.00404  |       | 1 d-1            |
| floc          | Maximal flocculation rate                                                                     | 0.000002 | 0.00000<br>2 | 0.000002 |       | d-1<br>mg-1<br>C |

|          |                                                                         |        |       |        |   |
|----------|-------------------------------------------------------------------------|--------|-------|--------|---|
| phyt     | Photo-oxidated fraction of T1 into T2                                   | 0.24   | 0.24  | 0.24   | - |
| T2       | Non-photolabile tDOC(T2_30d), aging T2_30d(T2_8y), aging T2_8y (T2_70y) | T2_30d | T2_8y | T1_70y |   |
| bioaging | Aging due to microbial degradation                                      | 0.1    | 0.005 | 0      | - |

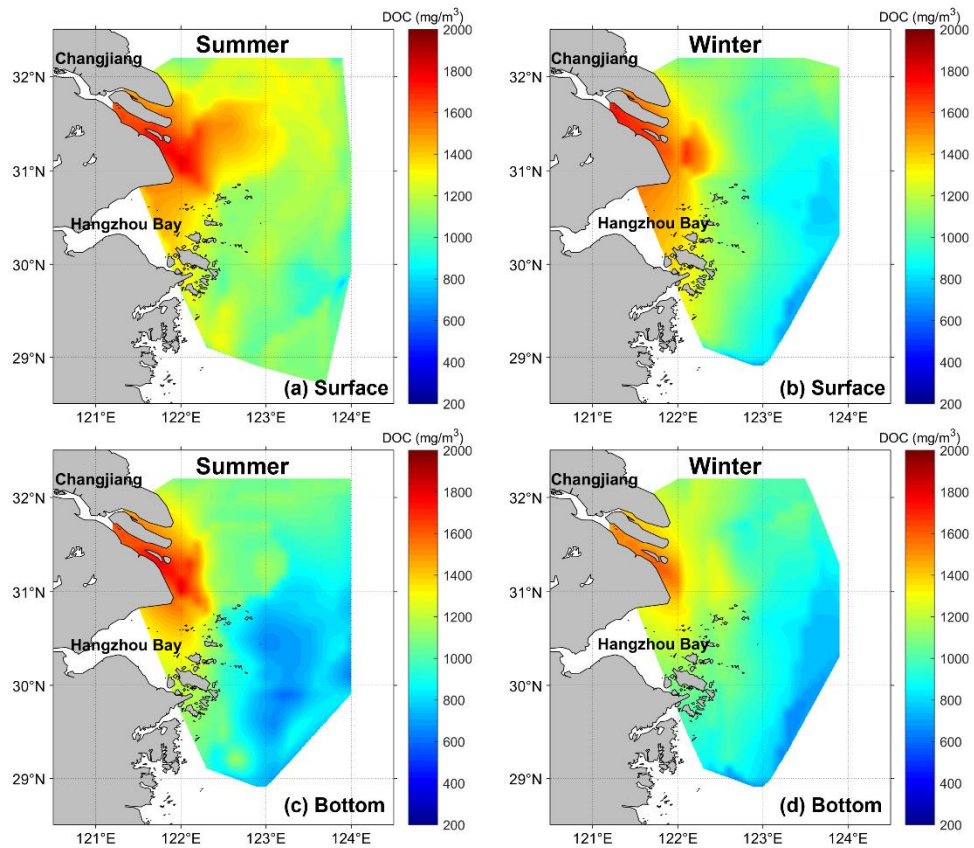

**Figure S1.** The observational average distribution of DOC concentration for both the surface and bottom layer in summer and winter.

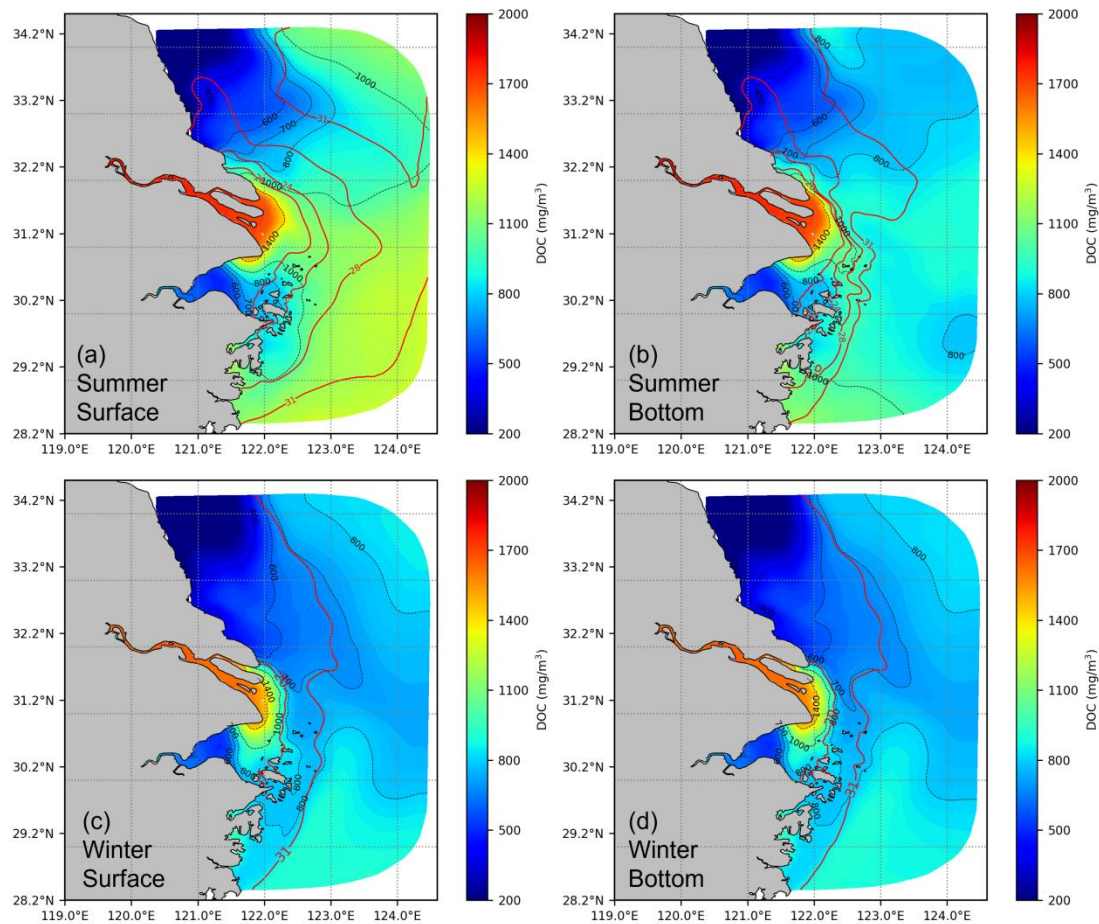

**Figure S2.** The simulated average distribution of DOC concentration for both the surface and bottom layer in summer and winter.

## References

Blackford, J. C., Allen, J. I., and Gilbert, F. J.: Ecosystem dynamics at six contrasting sites: a generic modelling study, *Journal of Marine Systems*, 52, 191-215, doi:

10.1016/j.jmarsys.2004.02.004, 2004.

Droop, M. J. J. o. t. M. B. A. o. t. U. K.: The nutrient status of algal cells in continuous culture, 54, 825-855, 1974.
